# Supplementary material for: Fast and robust multiple sequence alignment with phylogeny-aware gap placement
Source: PubMed Central journal article supplement (PMC3495709; doi:10.1186/1471-2105-13-129), 2012-06-13
Supplement: 1471-2105-13-129-S1.pdf [file 1471-2105-13-129-S1.pdf]

Eukaryota

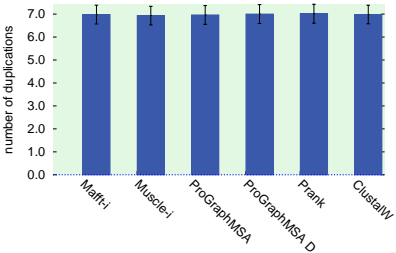

(202 pre)

Yeast

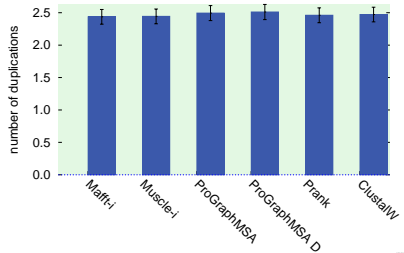

(202 pre)
